# Supplementary material
Source: Springer Nature journal article supplement (https://www.springermedizin.de/resource/supplementary/12963_2014_242_MOESM8_ESM.pdf/9572432)

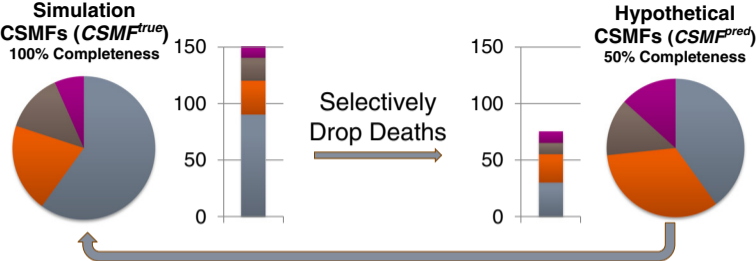

Hypothetical Causes of Death

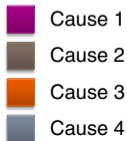

Probability of Deaths Dropped

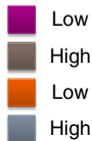

Supplement: MOESM8 [file 9572432]
